# Supplementary material for: Mechanical and thermal properties of toluene diisocyanate-modified cellulose nanocrystal nanocomposites using semi-crystalline poly(lactic acid) as a base matrix
Source: Royal Society of Chemistry journal article supplement (doi:10.1039/c6ra10993d), 2016-01-01
Supplement: c6ra10993d1.pdf [file c6ra10993d1.pdf]

**Fig. S1.** Elemental weight composition for pristine CNC and grafted CNC.

**Fig. S2.** X-Ray diffraction patterns of pristine CNC and mCNC.

**Fig. S3.** GPC traces of PLA grades with Y-axes ( *left*:  $d(\text{wt})/d(\log \text{Mw})$ , *right*: cumulative (%)), and X-axis (Slice Log Mw).

**Fig. S4.** Effects of CNCs and mCNCs on tensile properties (a: strength, and b: elongation modulus) of amorphous PLA nanocomposites<sup>35</sup>.

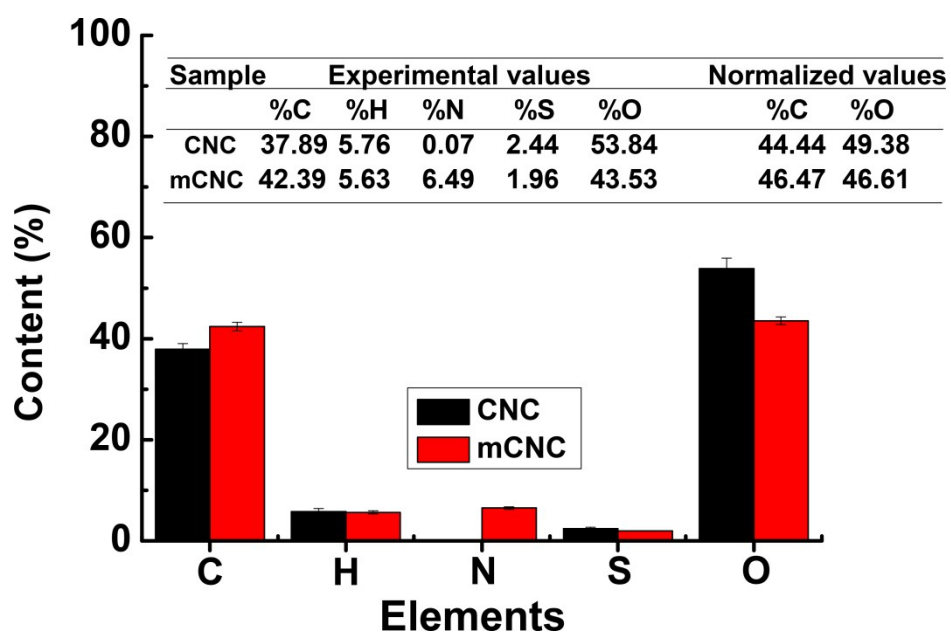

Fig. S1 Elemental weight composition for pristine CNC and grafted CNC.

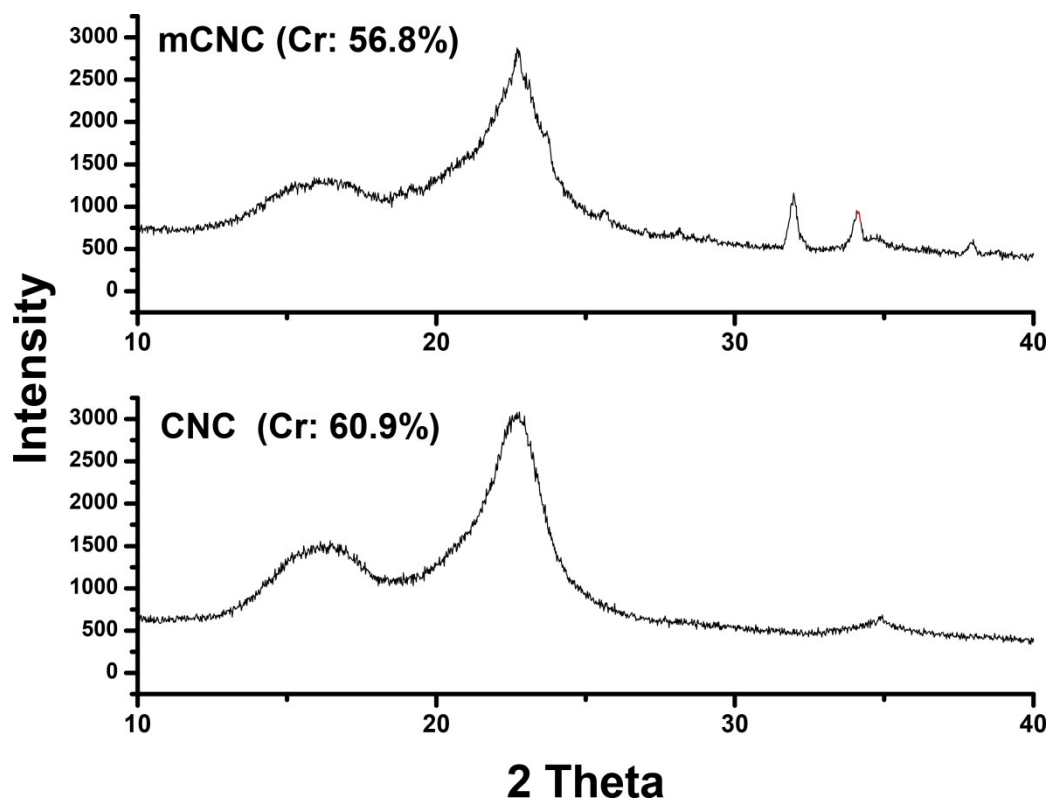

Fig. S2 X-Ray diffraction patterns of pristine CNC and mCNC.

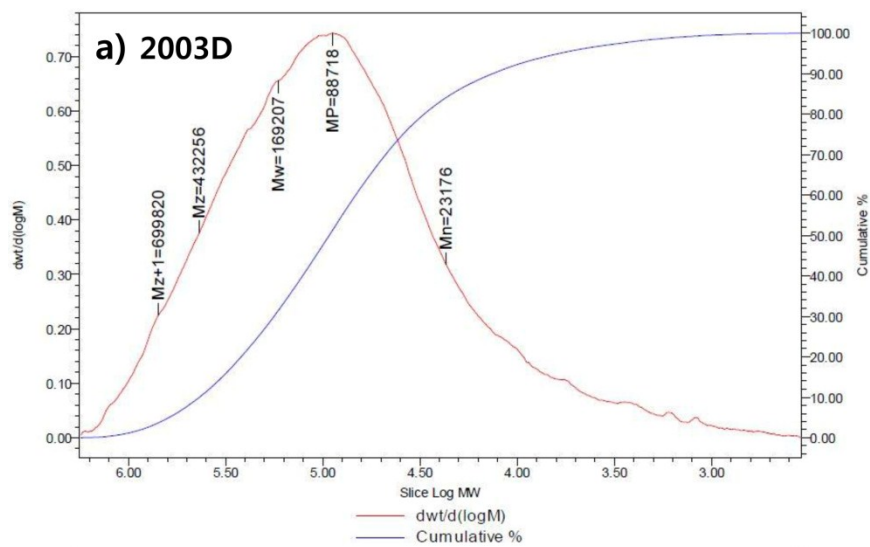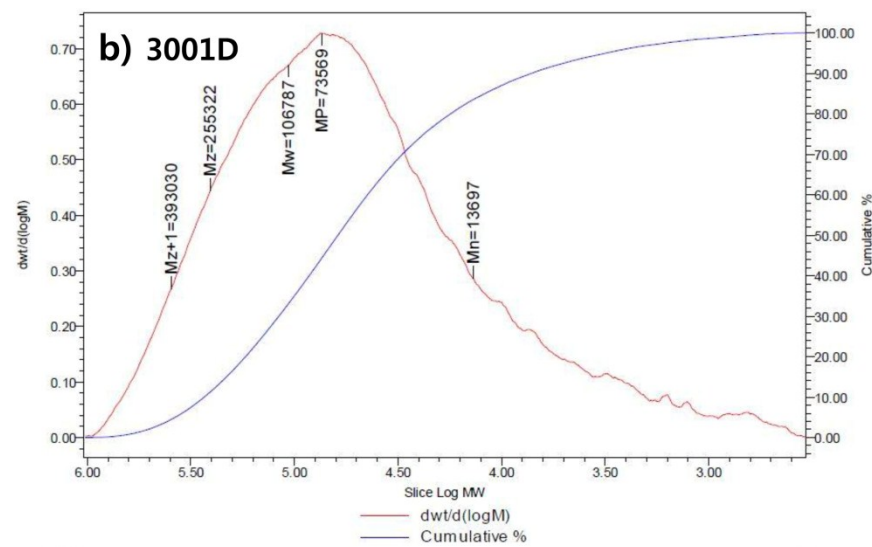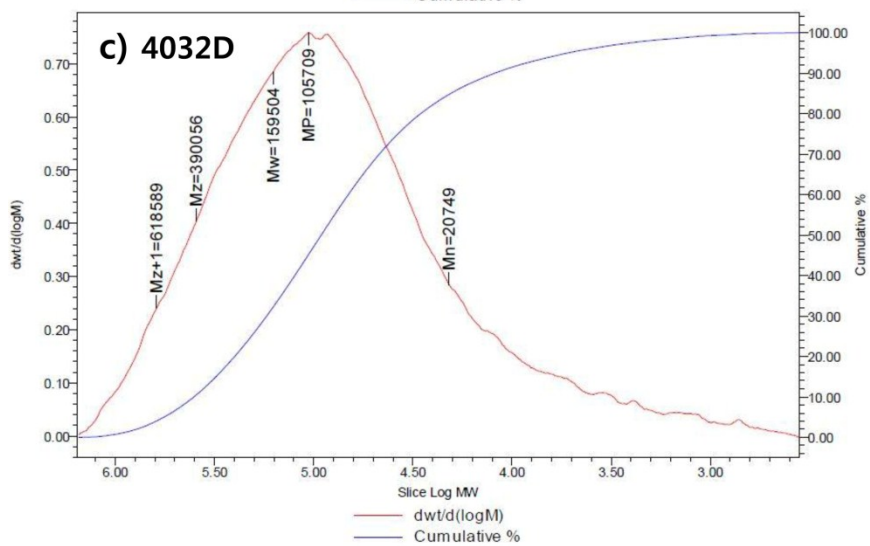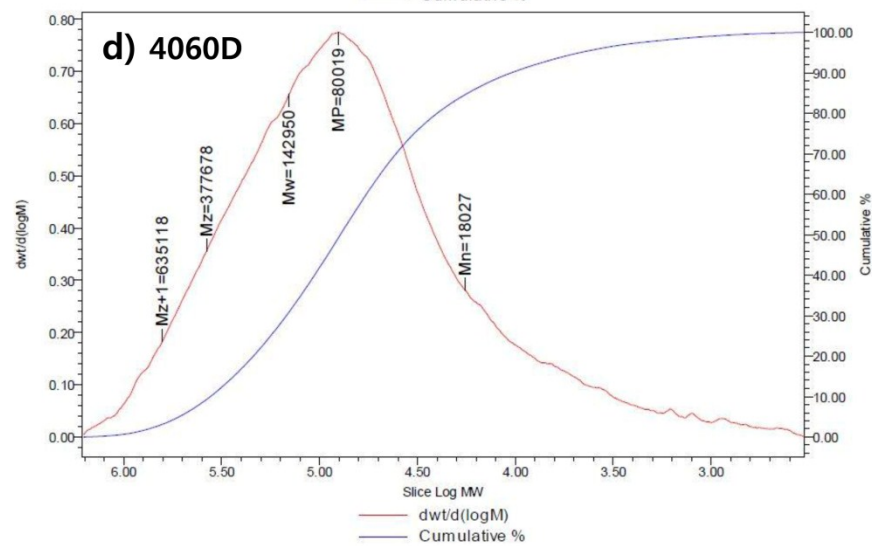

Fig. S3 GPC traces of PLA grades with Y-axes ( *left*:  $d(wt)/d(\log Mw)$ , *right*: cumulative (%)), and X-axis (Slice Log Mw).

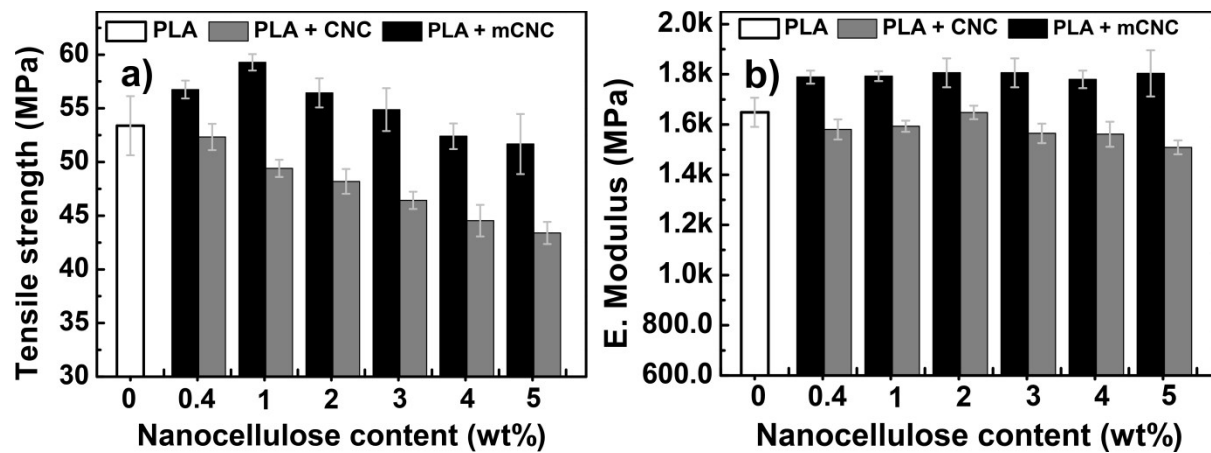

**Fig. S4.** Effects of CNCs and mCNCs on tensile properties (a: strength, and b: elongation modulus) of amorphous PLA nanocomposites<sup>35</sup>.
